# Supplementary material
Source: MDPI journal article supplement (https://www.mdpi.com/2311-7524/9/2/272)
Supplement: s1 [file s1]

| Gene            | Gene ID             | CDS<br>Length<br>(bp) | Protein<br>Length(aa<br>) | Molecular<br>Formula                                                                  | MW<br>(Da) | pI   | Number of<br>phosphate sites | Subcellular<br>Localization |
|-----------------|---------------------|-----------------------|---------------------------|---------------------------------------------------------------------------------------|------------|------|------------------------------|-----------------------------|
| <i>PebHLH1</i>  | P_edulia010000025.g | 864                   | 287                       | C <sub>1388</sub> H <sub>2201</sub> N <sub>407</sub> O <sub>443</sub> S <sub>19</sub> | 32.29      | 5.27 | Ser:27Thr:9 Yvr:5            | Periplasmic                 |
| <i>PebHLH2</i>  | P_edulia010000174.g | 834                   | 277                       | C <sub>1343</sub> H <sub>2122</sub> N <sub>388</sub> O <sub>427</sub> S <sub>19</sub> | 31.15      | 4.96 | Ser:25Thr:9 Yvr:5            | Periplasmic                 |
| <i>PebHLH3</i>  | P_edulia010000197.g | 276                   | 91                        | C <sub>436</sub> H <sub>751</sub> N <sub>143</sub> O <sub>146</sub> S <sub>3</sub>    | 10.43      | 10.1 | Ser:15Thr:4 Yvr:1            | Cytoplasmic                 |
| <i>PebHLH4</i>  | P_edulia010000268.g | 897                   | 298                       | C <sub>1377</sub> H <sub>2180</sub> N <sub>402</sub> O <sub>458</sub> S <sub>16</sub> | 32.21      | 4.85 | Ser:31Thr:13 Yvr:5           | Extracellular               |
| <i>PebHLH5</i>  | P_edulia010000282.g | 546                   | 181                       | C <sub>894</sub> H <sub>1469</sub> N <sub>259</sub> O <sub>266</sub> S <sub>7</sub>   | 20.33      | 9.7  | Ser:17Thr:10 Yvr:1           | Cytoplasmic                 |
| <i>PebHLH6</i>  | P_edulia010000327.g | 897                   | 298                       | C <sub>1380</sub> H <sub>2186</sub> N <sub>402</sub> O <sub>460</sub> S <sub>16</sub> | 32.29      | 4.85 | Ser:32Thr:13 Yvr:6           | Extracellular               |
| <i>PebHLH7</i>  | P_edulia010000337.g | 732                   | 243                       | C <sub>1179</sub> H <sub>1949</sub> N <sub>353</sub> O <sub>372</sub> S <sub>11</sub> | 27.38      | 9.01 | Ser:25Thr:18 Yvr:3           | Cytoplasmic                 |
| <i>PebHLH8</i>  | P_edulia010000399.g | 1230                  | 409                       | C <sub>1912</sub> H <sub>3050</sub> N <sub>558</sub> O <sub>630</sub> S <sub>15</sub> | 44.42      | 6.12 | Ser:48Thr:20 Yvr:4           | Extracellular               |
| <i>PebHLH9</i>  | P_edulia010000559.g | 732                   | 243                       | C <sub>1174</sub> H <sub>1938</sub> N <sub>350</sub> O <sub>373</sub> S <sub>11</sub> | 27.28      | 8.75 | Ser:25Thr:20 Yvr:3           | Cytoplasmic                 |
| <i>PebHLH10</i> | P_edulia010000654.g | 1239                  | 412                       | C <sub>1945</sub> H <sub>3085</sub> N <sub>597</sub> O <sub>651</sub> S <sub>20</sub> | 45.9       | 7.43 | Ser:55Thr:24 Yvr:11          | Extracellular               |
| <i>PebHLH11</i> | P_edulia010000688.g | 588                   | 195                       | C <sub>901</sub> H <sub>1467</sub> N <sub>279</sub> O <sub>305</sub> S <sub>11</sub>  | 21.44      | 7.93 | Ser:18Thr:15 Yvr:5           | Extracellular               |
| <i>PebHLH12</i> | P_edulia010000811.g | 483                   | 160                       | C <sub>784</sub> H <sub>1238</sub> N <sub>222</sub> O <sub>241</sub> S <sub>8</sub>   | 17.89      | 9.53 | Ser:18Thr:9 Yvr:8            | Periplasmic                 |
| <i>PebHLH13</i> | P_edulia010001544.g | 1059                  | 352                       | C <sub>1675</sub> H <sub>2645</sub> N <sub>509</sub> O <sub>535</sub> S <sub>13</sub> | 38.9       | 9.24 | Ser:41Thr:14 Yvr:12          | OuterMembrane               |
| <i>PebHLH14</i> | P_edulia010001547.g | 987                   | 328                       | C <sub>1579</sub> H <sub>2508</sub> N <sub>472</sub> O <sub>504</sub> S <sub>7</sub>  | 36.4       | 6.74 | Ser:41Thr:9 Yvr:5            | OuterMembrane               |
| <i>PebHLH15</i> | P_edulia010001733.g | 1011                  | 336                       | C <sub>1601</sub> H <sub>2586</sub> N <sub>444</sub> O <sub>532</sub> S <sub>11</sub> | 36.93      | 4.61 | Ser:47Thr:18 Yvr:6           | OuterMembrane               |
| <i>PebHLH16</i> | P_edulia010001951.g | 1689                  | 562                       | C <sub>2656</sub> H <sub>4210</sub> N <sub>792</sub> O <sub>866</sub> S <sub>9</sub>  | 61.39      | 9.3  | Ser:67Thr:36 Yvr:9           | Extracellular               |
| <i>PebHLH17</i> | P_edulia010002046.g | 1686                  | 561                       | C <sub>2650</sub> H <sub>4209</sub> N <sub>787</sub> O <sub>866</sub> S <sub>9</sub>  | 61.25      | 9.11 | Ser:66Thr:36 Yvr:9           | OuterMembrane               |
| <i>PebHLH18</i> | P_edulia010002170.g | 1614                  | 537                       | C <sub>2546</sub> H <sub>4045</sub> N <sub>731</sub> O <sub>821</sub> S <sub>22</sub> | 58.75      | 5.78 | Ser:62Thr:25 Yvr:6           | OuterMembrane               |
| <i>PebHLH19</i> | P_edulia010002249.g | 543                   | 180                       | C <sub>867</sub> H <sub>1460</sub> N <sub>260</sub> O <sub>277</sub> S <sub>10</sub>  | 20.28      | 8.76 | Ser:21Thr:10 Yvr:2           | Cytoplasmic                 |
| <i>PebHLH20</i> | P_edulia010002251.g | 744                   | 247                       | C <sub>1181</sub> H <sub>1920</sub> N <sub>350</sub> O <sub>388</sub> S <sub>7</sub>  | 27.46      | 7.27 | Ser:36Thr:10 Yvr:5           | OuterMembrane               |
| <i>PebHLH21</i> | P_edulia010002408.g | 1026                  | 341                       | C <sub>1646</sub> H <sub>2617</sub> N <sub>477</sub> O <sub>527</sub> S <sub>13</sub> | 37.94      | 6.63 | Ser:38Thr:21 Yvr:7           | OuterMembrane               |
| <i>PebHLH22</i> | P_edulia010002486.g | 897                   | 298                       | C <sub>1371</sub> H <sub>2228</sub> N <sub>410</sub> O <sub>425</sub> S <sub>15</sub> | 31.74      | 8.27 | Ser:29Thr:13 Yvr:2           | Periplasmic                 |

|                 |                     |      |     |                                                                                        |       |       |                     |               |
|-----------------|---------------------|------|-----|----------------------------------------------------------------------------------------|-------|-------|---------------------|---------------|
| <i>PebHLH23</i> | P_edulia010002837.g | 507  | 168 | C <sub>826</sub> H <sub>1309</sub> N <sub>233</sub> O <sub>254</sub> S <sub>9</sub>    | 18.86 | 8.49  | Ser:20Thr:10 Yvr:3  | Periplasmic   |
| <i>PebHLH24</i> | P_edulia010003035.g | 807  | 268 | C <sub>1249</sub> H <sub>1983</sub> N <sub>393</sub> O <sub>404</sub> S <sub>8</sub>   | 29.23 | 7.63  | Ser:16Thr:12 Yvr:5  | Periplasmic   |
| <i>PebHLH25</i> | P_edulia010003249.g | 1716 | 571 | C <sub>2704</sub> H <sub>4281</sub> N <sub>785</sub> O <sub>868</sub> S <sub>31</sub>  | 62.68 | 5.4   | Ser:60Thr:23 Yvr:11 | OuterMembrane |
| <i>PebHLH26</i> | P_edulia010003371.g | 852  | 283 | C <sub>1339</sub> H <sub>2169</sub> N <sub>385</sub> O <sub>411</sub> S <sub>16</sub>  | 30.76 | 8.48  | Ser:32Thr:12 Yvr:6  | Periplasmic   |
| <i>PebHLH27</i> | P_edulia010003459.g | 882  | 293 | C <sub>1356</sub> H <sub>2185</sub> N <sub>401</sub> O <sub>417</sub> S <sub>11</sub>  | 31.14 | 6.69  | Ser:21Thr:9 Yvr:2   | Periplasmic   |
| <i>PebHLH28</i> | P_edulia010003697.g | 1656 | 551 | C <sub>2643</sub> H <sub>4236</sub> N <sub>776</sub> O <sub>802</sub> S <sub>29</sub>  | 60.65 | 9.72  | Ser:51Thr:32 Yvr:5  | Periplasmic   |
| <i>PebHLH29</i> | P_edulia010003732.g | 1461 | 486 | C <sub>2342</sub> H <sub>3744</sub> N <sub>686</sub> O <sub>742</sub> S <sub>23</sub>  | 54.13 | 6.1   | Ser:50Thr:25 Yvr:6  | Cytoplasmic   |
| <i>PebHLH30</i> | P_edulia010003820.g | 1902 | 633 | C <sub>3154</sub> H <sub>4889</sub> N <sub>855</sub> O <sub>1017</sub> S <sub>29</sub> | 72    | 4.51  | Ser:63Thr:23 Yvr:18 | OuterMembrane |
| <i>PebHLH31</i> | P_edulia010003917.g | 1128 | 375 | C <sub>1722</sub> H <sub>2770</sub> N <sub>546</sub> O <sub>561</sub> S <sub>22</sub>  | 40.81 | 9.54  | Ser:44Thr:27 Yvr:4  | Extracellular |
| <i>PebHLH32</i> | P_edulia010004078.g | 1026 | 341 | C <sub>1580</sub> H <sub>2517</sub> N <sub>455</sub> O <sub>523</sub> S <sub>19</sub>  | 36.87 | 6.31  | Ser:47Thr:22 Yvr:5  | OuterMembrane |
| <i>PebHLH33</i> | P_edulia010004143.g | 1233 | 410 | C <sub>1904</sub> H <sub>3023</sub> N <sub>567</sub> O <sub>637</sub> S <sub>21</sub>  | 44.73 | 6.32  | Ser:54Thr:15 Yvr:8  | Extracellular |
| <i>PebHLH34</i> | P_edulia010004178.g | 1050 | 349 | C <sub>1712</sub> H <sub>2700</sub> N <sub>466</sub> O <sub>553</sub> S <sub>25</sub>  | 39.47 | 4.41  | Ser:27Thr:21 Yvr:6  | Cytoplasmic   |
| <i>PebHLH35</i> | P_edulia010004220.g | 993  | 330 | C <sub>1621</sub> H <sub>2592</sub> N <sub>476</sub> O <sub>504</sub> S <sub>16</sub>  | 37.33 | 7.74  | Ser:30Thr:19 Yvr:9  | Periplasmic   |
| <i>PebHLH36</i> | P_edulia010004257.g | 993  | 330 | C <sub>1616</sub> H <sub>2592</sub> N <sub>476</sub> O <sub>506</sub> S <sub>16</sub>  | 37.3  | 7.72  | Ser:30Thr:19 Yvr:9  | Extracellular |
| <i>PebHLH37</i> | P_edulia010004752.g | 1086 | 361 | C <sub>1683</sub> H <sub>2670</sub> N <sub>512</sub> O <sub>558</sub> S <sub>9</sub>   | 39.3  | 8.7   | Ser:48Thr:21 Yvr:15 | OuterMembrane |
| <i>PebHLH38</i> | P_edulia010004764.g | 480  | 159 | C <sub>781</sub> H <sub>1311</sub> N <sub>255</sub> O <sub>222</sub> S <sub>9</sub>    | 18.12 | 11.25 | Ser:12Thr:4 Yvr:4   | Cytoplasmic   |
| <i>PebHLH39</i> | P_edulia010004941.g | 1728 | 575 | C <sub>2692</sub> H <sub>4291</sub> N <sub>785</sub> O <sub>876</sub> S <sub>18</sub>  | 62.26 | 7.06  | Ser:73Thr:32 Yvr:6  | Extracellular |
| <i>PebHLH40</i> | P_edulia010005074.g | 1596 | 531 | C <sub>2491</sub> H <sub>3945</sub> N <sub>719</sub> O <sub>819</sub> S <sub>18</sub>  | 57.66 | 5.89  | Ser:69Thr:29 Yvr:6  | Extracellular |
| <i>PebHLH41</i> | P_edulia010005133.g | 438  | 145 | C <sub>732</sub> H <sub>1130</sub> N <sub>194</sub> O <sub>208</sub> S <sub>12</sub>   | 16.36 | 7.05  | Ser:8Thr:9 Yvr:8    | Periplasmic   |
| <i>PebHLH42</i> | P_edulia020005717.g | 2127 | 708 | C <sub>3195</sub> H <sub>5111</sub> N <sub>967</sub> O <sub>1090</sub> S <sub>54</sub> | 76.25 | 6.05  | Ser:109Thr:21 Yvr:8 | Extracellular |
| <i>PebHLH43</i> | P_edulia020005799.g | 627  | 208 | C <sub>1011</sub> H <sub>1711</sub> N <sub>339</sub> O <sub>314</sub> S <sub>5</sub> S | 23.04 | 11.85 | Ser:23Thr:13 Yvr:2  | Cytoplasmic   |
| <i>PebHLH44</i> | P_edulia020006403.g | 543  | 180 | C <sub>875</sub> H <sub>1437</sub> N <sub>255</sub> O <sub>279</sub> S <sub>6</sub>    | 20.19 | 7.19  | Ser:16Thr:14 Yvr:2  | Cytoplasmic   |
| <i>PebHLH45</i> | P_edulia020006498.g | 792  | 263 | C <sub>1253</sub> H <sub>2041</sub> N <sub>353</sub> O <sub>403</sub> S <sub>8</sub>   | 28.76 | 7.97  | Ser:30Thr:18 Yvr:6  | OuterMembrane |
| <i>PebHLH46</i> | P_edulia020006616.g | 948  | 315 | C <sub>1382</sub> H <sub>2262</sub> N <sub>424</sub> O <sub>456</sub> S <sub>18</sub>  | 32.7  | 8.5   | Ser:32Thr:16 Yvr:2  | Periplasmic   |

|                 |                     |      |     |                                                                                         |       |       |                     |               |
|-----------------|---------------------|------|-----|-----------------------------------------------------------------------------------------|-------|-------|---------------------|---------------|
| <i>PebHLH47</i> | P_edulia020006799.g | 657  | 218 | C <sub>1071</sub> H <sub>1749</sub> N <sub>307</sub> O <sub>353</sub> S <sub>8</sub>    | 24.84 | 5.08  | Ser:22Thr:17 Yvr:5  | Cytoplasmic   |
| <i>PebHLH48</i> | P_edulia020007138.g | 504  | 167 | C <sub>806</sub> H <sub>1281</sub> N <sub>231</sub> O <sub>258</sub> S <sub>10</sub>    | 18.66 | 8.22  | Ser:21Thr:9 Yvr:3   | Extracellular |
| <i>PebHLH49</i> | P_edulia030007744.g | 999  | 332 | C <sub>1614</sub> H <sub>2556</sub> N <sub>474</sub> O <sub>521</sub> S <sub>13</sub>   | 37.36 | 6.44  | Ser:34Thr:20 Yvr:11 | OuterMembrane |
| <i>PebHLH50</i> | P_edulia030008418.g | 996  | 331 | C <sub>1599</sub> H <sub>2529</sub> N <sub>451</sub> O <sub>530</sub> S <sub>17</sub>   | 37.1  | 4.57  | Ser:38Thr:16 Yvr:7  | Extracellular |
| <i>PebHLH51</i> | P_edulia030008516.g | 1200 | 399 | C <sub>1836</sub> H <sub>2907</sub> N <sub>543</sub> O <sub>612</sub> S <sub>21</sub>   | 43.06 | 5.86  | Ser:57Thr:13 Yvr:9  | Extracellular |
| <i>PebHLH52</i> | P_edulia030008687.g | 942  | 313 | C <sub>1488</sub> H <sub>2391</sub> N <sub>449</sub> O <sub>488</sub> S <sub>10</sub>   | 34.71 | 8.78  | Ser:39Thr:16 Yvr:6  | Periplasmic   |
| <i>PebHLH53</i> | P_edulia030009134.g | 282  | 93  | C <sub>445</sub> H <sub>765</sub> N <sub>143</sub> O <sub>147</sub> S <sub>3</sub>      | 10.57 | 9.4   | Ser:14Thr:5 Yvr:1   | Cytoplasmic   |
| <i>PebHLH54</i> | P_edulia030009305.g | 1383 | 460 | C <sub>2288</sub> H <sub>3633</sub> N <sub>649</sub> O <sub>709</sub> S <sub>19</sub>   | 52.2  | 5.36  | Ser:35Thr:23 Yvr:9  | Cytoplasmic   |
| <i>PebHLH55</i> | P_edulia040009572.g | 1020 | 339 | C <sub>1694</sub> H <sub>2711</sub> N <sub>499</sub> O <sub>523</sub> S <sub>13</sub>   | 38.86 | 8.9   | Ser:31Thr:16 Yvr:9  | OuterMembrane |
| <i>PebHLH56</i> | P_edulia040009648.g | 2193 | 730 | C <sub>3593</sub> H <sub>5683</sub> N <sub>1025</sub> O <sub>1091</sub> S <sub>24</sub> | 81.5  | 8.17  | Ser:75Thr:32 Yvr:17 | OuterMembrane |
| <i>PebHLH57</i> | P_edulia040009651.g | 2073 | 690 | C <sub>3356</sub> H <sub>5339</sub> N <sub>981</sub> O <sub>1037</sub> S <sub>25</sub>  | 76.84 | 7.91  | Ser:78Thr:25 Yvr:13 | OuterMembrane |
| <i>PebHLH58</i> | P_edulia040009719.g | 1527 | 508 | C <sub>2446</sub> H <sub>3890</sub> N <sub>696</sub> O <sub>757</sub> S <sub>23</sub>   | 55.91 | 6.88  | Ser:44Thr:27 Yvr:6  | Periplasmic   |
| <i>PebHLH59</i> | P_edulia040010024.g | 1215 | 404 | C <sub>1947</sub> H <sub>3093</sub> N <sub>543</sub> O <sub>639</sub> S <sub>23</sub>   | 45.08 | 6.01  | Ser:53Thr:23 Yvr:11 | Extracellular |
| <i>PebHLH60</i> | P_edulia040010027.g | 1008 | 335 | C <sub>1636</sub> H <sub>2598</sub> N <sub>468</sub> O <sub>531</sub> S <sub>18</sub>   | 37.9  | 4.93  | Ser:36Thr:16 Yvr:6  | Cytoplasmic   |
| <i>PebHLH61</i> | P_edulia040010798.g | 1857 | 618 | C <sub>3044</sub> H <sub>4821</sub> N <sub>851</sub> O <sub>965</sub> S <sub>21</sub>   | 69.47 | 4.96  | Ser:62Thr:32 Yvr:14 | OuterMembrane |
| <i>PebHLH62</i> | P_edulia040010857.g | 801  | 266 | C <sub>1307</sub> H <sub>2120</sub> N <sub>378</sub> O <sub>424</sub> S <sub>10</sub>   | 30.24 | 5.5   | Ser:32Thr:9 Yvr:5   | Cytoplasmic   |
| <i>PebHLH63</i> | P_edulia040010964.g | 936  | 311 | C <sub>1542</sub> H <sub>2506</sub> N <sub>442</sub> O <sub>465</sub> S <sub>13</sub>   | 35.1  | 8.69  | Ser:26Thr:16 Yvr:8  | Cytoplasmic   |
| <i>PebHLH64</i> | P_edulia040011045.g | 936  | 311 | C <sub>1543</sub> H <sub>2504</sub> N <sub>440</sub> O <sub>464</sub> S <sub>13</sub>   | 35.07 | 8.47  | Ser:26Thr:16 Yvr:8  | Cytoplasmic   |
| <i>PebHLH65</i> | P_edulia050011485.g | 282  | 93  | C <sub>439</sub> H <sub>752</sub> N <sub>142</sub> O <sub>151</sub> S <sub>3</sub>      | 10.53 | 9.36  | Ser:17Thr:4 Yvr:1   | Cytoplasmic   |
| <i>PebHLH66</i> | P_edulia050012074.g | 1875 | 624 | C <sub>3040</sub> H <sub>4884</sub> N <sub>864</sub> O <sub>959</sub> S <sub>33</sub>   | 69.95 | 6.08  | Ser:71Thr:28 Yvr:12 | OuterMembrane |
| <i>PebHLH67</i> | P_edulia050012208.g | 1356 | 451 | C <sub>2165</sub> H <sub>3523</sub> N <sub>615</sub> O <sub>680</sub> S <sub>21</sub>   | 49.73 | 6.33  | Ser:41Thr:22 Yvr:5  | OuterMembrane |
| <i>PebHLH68</i> | P_edulia050012292.g | 1254 | 417 | C <sub>1971</sub> H <sub>3109</sub> N <sub>605</sub> O <sub>650</sub> S <sub>19</sub>   | 46.3  | 7.9   | Ser:49Thr:26 Yvr:12 | Extracellular |
| <i>PebHLH69</i> | P_edulia050012814.g | 528  | 175 | C <sub>880</sub> H <sub>1441</sub> N <sub>261</sub> O <sub>264</sub> S <sub>6</sub>     | 20.1  | 10.48 | Ser:18Thr:9 Yvr:3   | OuterMembrane |
| <i>PebHLH70</i> | P_edulia060013185.g | 279  | 92  | C <sub>443</sub> H <sub>761</sub> N <sub>141</sub> O <sub>144</sub> S <sub>3</sub>      | 10.46 | 9.4   | Ser:14Thr:4 Yvr:1   | Cytoplasmic   |

|                 |                     |      |      |                                                                                         |        |       |                     |               |
|-----------------|---------------------|------|------|-----------------------------------------------------------------------------------------|--------|-------|---------------------|---------------|
| <i>PebHLH71</i> | P_edulia060013549.g | 1188 | 395  | C <sub>1946</sub> H <sub>3067</sub> N <sub>559</sub> O <sub>626</sub> S <sub>17</sub>   | 44.87  | 4.96  | Ser:29Thr:21 Yvr:5  | Cytoplasmic   |
| <i>PebHLH72</i> | P_edulia060013896.g | 981  | 326  | C <sub>1543</sub> H <sub>2453</sub> N <sub>455</sub> O <sub>519</sub> S <sub>11</sub>   | 36.04  | 6.41  | Ser:47Thr:15 Yvr:4  | Extracellular |
| <i>PebHLH73</i> | P_edulia060014127.g | 3006 | 1001 | C <sub>5023</sub> H <sub>7998</sub> N <sub>1448</sub> O <sub>1539</sub> S <sub>42</sub> | 114.67 | 7.92  | Ser:61Thr:45 Yvr:20 | Cytoplasmic   |
| <i>PebHLH74</i> | P_edulia060014131.g | 1011 | 336  | C <sub>1639</sub> H <sub>2544</sub> N <sub>466</sub> O <sub>515</sub> S <sub>13</sub>   | 37.44  | 5.4   | Ser:29Thr:13 Yvr:12 | Extracellular |
| <i>PebHLH75</i> | P_edulia060014285.g | 759  | 252  | C <sub>1226</sub> H <sub>1956</sub> N <sub>366</sub> O <sub>377</sub> S <sub>10</sub>   | 28.18  | 7.2   | Ser:20Thr:7 Yvr:7   | Cytoplasmic   |
| <i>PebHLH76</i> | P_edulia060014286.g | 375  | 124  | C <sub>635</sub> H <sub>1023</sub> N <sub>171</sub> O <sub>183</sub> S <sub>5</sub>     | 14.14  | 6.53  | Ser:4Thr:4 Yvr:6    | Cytoplasmic   |
| <i>PebHLH77</i> | P_edulia060014293.g | 735  | 244  | C <sub>1189</sub> H <sub>1901</sub> N <sub>355</sub> O <sub>367</sub> S <sub>10</sub>   | 27.37  | 7.22  | Ser:20Thr:8 Yvr:6   | Periplasmic   |
| <i>PebHLH78</i> | P_edulia060014434.g | 1731 | 576  | C <sub>2685</sub> H <sub>4293</sub> N <sub>783</sub> O <sub>888</sub> S <sub>24</sub>   | 62.53  | 7     | Ser:83Thr:28 Yvr:5  | Extracellular |
| <i>PebHLH79</i> | P_edulia060014739.g | 1731 | 576  | C <sub>2687</sub> H <sub>4298</sub> N <sub>782</sub> O <sub>887</sub> S <sub>24</sub>   | 62.53  | 7     | Ser:83Thr:28 Yvr:5  | Extracellular |
| <i>PebHLH80</i> | P_edulia060014957.g | 1512 | 503  | C <sub>2448</sub> H <sub>3852</sub> N <sub>692</sub> O <sub>762</sub> S <sub>18</sub>   | 55.76  | 6.33  | Ser:48Thr:19 Yvr:11 | OuterMembrane |
| <i>PebHLH81</i> | P_edulia060014961.g | 1059 | 352  | C <sub>1607</sub> H <sub>2575</sub> N <sub>483</sub> O <sub>536</sub> S <sub>11</sub>   | 37.6   | 9.37  | Ser:49Thr:25 Yvr:7  | OuterMembrane |
| <i>PebHLH82</i> | P_edulia060015141.g | 903  | 300  | C <sub>1481</sub> H <sub>2379</sub> N <sub>437</sub> O <sub>435</sub> S <sub>17</sub>   | 33.82  | 10.19 | Ser:27Thr:19 Yvr:6  | Periplasmic   |
| <i>PebHLH83</i> | P_edulia060015278.g | 1167 | 388  | C <sub>1813</sub> H <sub>2877</sub> N <sub>537</sub> O <sub>579</sub> S <sub>21</sub>   | 42.14  | 6.99  | Ser:46Thr:14 Yvr:6  | Extracellular |
| <i>PebHLH84</i> | P_edulia060015326.g | 807  | 268  | C <sub>1240</sub> H <sub>1996</sub> N <sub>366</sub> O <sub>417</sub> S <sub>14</sub>   | 29.16  | 6.4   | Ser:36Thr:16 Yvr:6  | OuterMembrane |
| <i>PebHLH85</i> | P_edulia060015483.g | 756  | 251  | C <sub>1158</sub> H <sub>1916</sub> N <sub>384</sub> O <sub>378</sub> S <sub>9</sub>    | 27.56  | 9.34  | Ser:24Thr:11 Yvr:2  | Cytoplasmic   |
| <i>PebHLH86</i> | P_edulia060015569.g | 1257 | 418  | C <sub>1978</sub> H <sub>3080</sub> N <sub>564</sub> O <sub>645</sub> S <sub>13</sub>   | 45.51  | 7     | Ser:64Thr:19 Yvr:11 | Extracellular |
| <i>PebHLH87</i> | P_edulia060015572.g | 1224 | 407  | C <sub>1924</sub> H <sub>2999</sub> N <sub>547</sub> O <sub>627</sub> S <sub>13</sub>   | 44.25  | 7.26  | Ser:64Thr:18 Yvr:11 | Extracellular |
| <i>PebHLH88</i> | P_edulia060015675.g | 1893 | 630  | C <sub>2922</sub> H <sub>4635</sub> N <sub>839</sub> O <sub>943</sub> S <sub>31</sub>   | 67.61  | 6.31  | Ser:73Thr:31 Yvr:9  | Extracellular |
| <i>PebHLH89</i> | P_edulia060015676.g | 1059 | 352  | C <sub>1704</sub> H <sub>2704</sub> N <sub>506</sub> O <sub>529</sub> S <sub>13</sub>   | 39.17  | 8.9   | Ser:39Thr:22 Yvr:5  | OuterMembrane |
| <i>PebHLH90</i> | P_edulia060015761.g | 1032 | 343  | C <sub>1667</sub> H <sub>2633</sub> N <sub>461</sub> O <sub>537</sub> S <sub>22</sub>   | 38.44  | 4.56  | Ser:31Thr:15 Yvr:8  | Cytoplasmic   |
| <i>PebHLH91</i> | P_edulia060016178.g | 654  | 217  | C <sub>1076</sub> H <sub>1749</sub> N <sub>319</sub> O <sub>337</sub> S <sub>8</sub>    | 24.81  | 10.09 | Ser:23Thr:13 Yvr:5  | Cytoplasmic   |
| <i>PebHLH92</i> | P_edulia060016294.g | 1461 | 486  | C <sub>2432</sub> H <sub>3929</sub> N <sub>691</sub> O <sub>721</sub> S <sub>19</sub>   | 55     | 9.53  | Ser:42Thr:21 Yvr:13 | Cytoplasmic   |
| <i>PebHLH93</i> | P_edulia060016388.g | 846  | 281  | C <sub>1359</sub> H <sub>2135</sub> N <sub>395</sub> O <sub>430</sub> S <sub>12</sub>   | 31.28  | 5.11  | Ser:26Thr:8 Yvr:8   | Cytoplasmic   |
| <i>PebHLH94</i> | P_edulia070017352.g | 801  | 266  | C <sub>1267</sub> H <sub>2062</sub> N <sub>372</sub> O <sub>407</sub> S <sub>11</sub>   | 29.37  | 6.18  | Ser:35Thr:11 Yvr:1  | Cytoplasmic   |

|                  |                           |      |     |                                                                                        |       |       |                     |               |
|------------------|---------------------------|------|-----|----------------------------------------------------------------------------------------|-------|-------|---------------------|---------------|
| <i>PebHLH95</i>  | P_edulia070017416.g       | 504  | 167 | C <sub>842</sub> H <sub>1377</sub> N <sub>253</sub> O <sub>252</sub> S <sub>10</sub>   | 19.4  | 9.73  | Ser:16Thr:4 Yvr:4   | Cytoplasmic   |
| <i>PebHLH96</i>  | P_edulia070017581.g       | 714  | 237 | C <sub>1145</sub> H <sub>1839</sub> N <sub>325</sub> O <sub>355</sub> S <sub>12</sub>  | 26.23 | 8.68  | Ser:19Thr:12 Yvr:3  | Periplasmic   |
| <i>PebHLH97</i>  | P_edulia070017993.g       | 1746 | 581 | C <sub>2839</sub> H <sub>4498</sub> N <sub>828</sub> O <sub>879</sub> S <sub>27</sub>  | 65.17 | 7.76  | Ser:77Thr:26 Yvr:12 | OuterMembrane |
| <i>PebHLH98</i>  | P_edulia080019251.g       | 672  | 223 | C <sub>963</sub> H <sub>1599</sub> N <sub>303</sub> O <sub>319</sub> S <sub>14</sub>   | 22.98 | 8.89  | Ser:18Thr:11 Yvr:2  | Periplasmic   |
| <i>PebHLH99</i>  | P_edulia080019349.g       | 585  | 194 | C <sub>948</sub> H <sub>1615</sub> N <sub>291</sub> O <sub>271</sub> S <sub>12</sub>   | 21.81 | 11.16 | Ser:21Thr:9 Yvr:1   | Cytoplasmic   |
| <i>PebHLH100</i> | P_edulia080019445.g       | 747  | 248 | C <sub>1250</sub> H <sub>2023</sub> N <sub>337</sub> O <sub>390</sub> S <sub>10</sub>  | 28.34 | 5.03  | Ser:20Thr:11 Yvr:8  | Cytoplasmic   |
| <i>PebHLH101</i> | P_edulia080019716.g       | 1089 | 362 | C <sub>1799</sub> H <sub>2832</sub> N <sub>496</sub> O <sub>538</sub> S <sub>18</sub>  | 40.6  | 8.62  | Ser:44Thr:20 Yvr:8  | OuterMembrane |
| <i>PebHLH102</i> | P_edulia080019833.g       | 954  | 317 | C <sub>1501</sub> H <sub>2384</sub> N <sub>424</sub> O <sub>476</sub> S <sub>21</sub>  | 34.67 | 5.82  | Ser:30Thr:20 Yvr:5  | Periplasmic   |
| <i>PebHLH103</i> | P_edulia080019900.g       | 1020 | 339 | C <sub>1607</sub> H <sub>2565</sub> N <sub>481</sub> O <sub>527</sub> S <sub>17</sub>  | 37.61 | 6.7   | Ser:40Thr:14 Yvr:6  | Periplasmic   |
| <i>PebHLH104</i> | P_edulia080019951.g       | 1968 | 655 | C <sub>3203</sub> H <sub>4979</sub> N <sub>939</sub> O <sub>1011</sub> S <sub>38</sub> | 74.05 | 6.01  | Ser:49Thr:24 Yvr:15 | Periplasmic   |
| <i>PebHLH105</i> | P_edulia080020119.g       | 1029 | 342 | C <sub>1699</sub> H <sub>2718</sub> N <sub>464</sub> O <sub>526</sub> S <sub>16</sub>  | 38.58 | 7.18  | Ser:37Thr:14 Yvr:7  | Periplasmic   |
| <i>PebHLH106</i> | P_edulia080020316.g       | 1491 | 496 | C <sub>2336</sub> H <sub>3700</sub> N <sub>704</sub> O <sub>768</sub> S <sub>23</sub>  | 54.68 | 8.28  | Ser:65Thr:30 Yvr:11 | OuterMembrane |
| <i>PebHLH107</i> | P_edulia080020378.g       | 1686 | 561 | C <sub>2670</sub> H <sub>4209</sub> N <sub>783</sub> O <sub>854</sub> S <sub>28</sub>  | 61.85 | 7.88  | Ser:71Thr:32 Yvr:13 | OuterMembrane |
| <i>PebHLH108</i> | P_edulia090020665.g       | 1263 | 420 | C <sub>2015</sub> H <sub>3203</sub> N <sub>579</sub> O <sub>660</sub> S <sub>16</sub>  | 46.62 | 5.73  | Ser:54Thr:24 Yvr:6  | OuterMembrane |
| <i>PebHLH109</i> | P_edulia090021815.g       | 711  | 236 | C <sub>1137</sub> H <sub>1827</sub> N <sub>325</sub> O <sub>352</sub> S <sub>12</sub>  | 26.07 | 8.2   | Ser:18Thr:8 Yvr:3   | Periplasmic   |
| <i>PebHLH110</i> | P_edulia090021840.g       | 786  | 261 | C <sub>1264</sub> H <sub>1982</sub> N <sub>360</sub> O <sub>399</sub> S <sub>7</sub>   | 28.84 | 9.83  | Ser:34Thr:18 Yvr:7  | Extracellular |
| <i>PebHLH111</i> | P_eduliaContig10022887.g  | 999  | 332 | C <sub>1590</sub> H <sub>2473</sub> N <sub>461</sub> O <sub>533</sub> S <sub>14</sub>  | 37.03 | 5.13  | Ser:40Thr:18 Yvr:7  | Extracellular |
| <i>PebHLH112</i> | P_eduliaContig20022701.g  | 753  | 250 | C <sub>1230</sub> H <sub>2013</sub> N <sub>359</sub> O <sub>365</sub> S <sub>7</sub>   | 27.9  | 10.42 | Ser:26Thr:9 Yvr:3   | OuterMembrane |
| <i>PebHLH113</i> | P_eduliaContig60022398.g  | 987  | 328 | C <sub>1565</sub> H <sub>2463</sub> N <sub>441</sub> O <sub>526</sub> S <sub>10</sub>  | 36.2  | 5.09  | Ser:46Thr:15 Yvr:8  | OuterMembrane |
| <i>PebHLH114</i> | P_eduliaContig60022430.g  | 825  | 274 | C <sub>1333</sub> H <sub>2112</sub> N <sub>386</sub> O <sub>418</sub> S <sub>15</sub>  | 30.72 | 8.81  | Ser:23Thr:22 Yvr:5  | Extracellular |
| <i>PebHLH115</i> | P_eduliaContig140022939.g | 1656 | 551 | C <sub>2650</sub> H <sub>4231</sub> N <sub>773</sub> O <sub>804</sub> S <sub>28</sub>  | 60.69 | 9.6   | Ser:52Thr:32 Yvr:6  | Periplasmic   |
| <i>PebHLH116</i> | P_eduliaContig200022646.g | 1323 | 440 | C <sub>2209</sub> H <sub>3454</sub> N <sub>624</sub> O <sub>694</sub> S <sub>19</sub>  | 50.48 | 5.34  | Ser:32Thr:22 Yvr:12 | Cytoplasmic   |
| <i>PebHLH117</i> | P_eduliaContig250022291.g | 807  | 268 | C <sub>1250</sub> H <sub>1983</sub> N <sub>393</sub> O <sub>404</sub> S <sub>9</sub>   | 29.28 | 7.56  | Ser:16Thr:12 Yvr:5  | Periplasmic   |

---
